# Supplementary material for: Association of ambient PM1 exposure with maternal blood pressure and hypertensive disorders of pregnancy in China
Source: PubMed Central journal article supplement — iScience. 2023 May 12;26(6):106863. doi: 10.1016/j.isci.2023.106863 (PMC10225929; doi:10.1016/j.isci.2023.106863), 2023-05-12
Supplement: mmc1.pdf [file mmc1.pdf]

**Supplemental information**

**Association of ambient PM<sub>1</sub> exposure with maternal  
blood pressure and hypertensive  
disorders of pregnancy in China**

**Man Zhang, Bo-Yi Yang, Yuqin Zhang, Yongqing Sun, Ruixia Liu, Yue Zhang, Shaofei Su, Enjie Zhang, Xiaoting Zhao, Gongbo Chen, Qizhen Wu, Lixin Hu, Yunting Zhang, Lebing Wang, Yana Luo, Xiaoxuan Liu, Jiabin Li, Sihan Wu, Xin Mi, Wangjian Zhang, Guanghui Dong, Chenghong Yin, and Wentao Yue**

## **Supplemental information**

### **Association of ambient PM<sub>1</sub> exposure with maternal blood pressure and hypertensive disorders of pregnancy in China**

**Man Zhang, Bo-Yi Yang, Yuqin Zhang, Yongqing Sun, Ruixia Liu, Yue Zhang, Shaofei Su, Enjie Zhang, Xiaoting Zhao, Gongbo Chen, Qizhen Wu, Lixin Hu, Yunting Zhang, Lebing Wang, Yana Luo, Xiaoxuan Liu, Jiabin Li, Sihan Wu, Xin Mi, Wangjian Zhang, Guanghui Dong, Chenghong Yin, and Wentao Yue**

## **Supplemental information**

### **Association of ambient PM<sub>1</sub> exposure with maternal blood pressure and hypertensive disorders of pregnancy in China**

**Man Zhang, Bo-Yi Yang, Yuqin Zhang, Yongqing Sun, Ruixia Liu, Yue Zhang, Shaofei Su, Enjie Zhang, Xiaoting Zhao, Gongbo Chen, Qizhen Wu, Lixin Hu, Yunting Zhang, Lebing Wang, Yana Luo, Xiaoxuan Liu, Jiaxin Li, Sihan Wu, Xin Mi, Wangjian Zhang, Guanghui Dong, Chenghong Yin, Wentao Yue**

**Table S1. Number of participants of 38 hospitals in 17 provinces, related to STAR Methods.**

| Province       | Hospital                                                                         | Number of participants |
|----------------|----------------------------------------------------------------------------------|------------------------|
| Inner Mongolia | Chifeng Obstetrics and Gynecology Hospital                                       | 1,535                  |
| Inner Mongolia | Inner Mongolia People's Hospital                                                 | 1,079                  |
| Inner Mongolia | Maternal and Child Health Hospital of Inner Mongolia Autonomous Region           | 344                    |
| Liaoning       | Women and Children's Hospital of Jinzhou                                         | 1,600                  |
| Liaoning       | Panjin Liaoyou Baoshihua Hospital                                                | 287                    |
| Beijing        | Beijing Obstetrics and Gynecology Hospital, Capital Medical University           | 26,782                 |
| Beijing        | Tongzhou Maternal&Child Health Hospital of Beijing                               | 3,950                  |
| Beijing        | Beijing Changping Maternal and Child Care Hospital                               | 2,332                  |
| Beijing        | Beijing Fangshan Maternal and Child Care Hospital                                | 1,411                  |
| Beijing        | Beijing Daxing Maternal and Child Care Hospital                                  | 1,136                  |
| Beijing        | Beijing Huairou Maternal and Child Care Hospital                                 | 107                    |
| Beijing        | Beijing Tongzhou Hospital of Integrated Traditional Chinese and Western Medicine | 23                     |
| Tianjin        | Tianjin Central Hospital of Gynecology Hospital                                  | 1,258                  |
| Hebei          | Shijiazhuang Obstetrics and Gynecology Hospital                                  | 1,706                  |
| Hebei          | Hebei Provincial Gucheng City Hospital                                           | 665                    |
| Hebei          | Qinghe People's Hospital                                                         | 218                    |
| Shandong       | Weifang Maternal and Child Health Hospital                                       | 5,486                  |
| Shandong       | Shandong Provincial Hospital                                                     | 5,042                  |
| Shandong       | Maternal and Child Health Care of Zaozhuang                                      | 3,469                  |
| Shandong       | Maternal and Child Health Care of Linyi                                          | 2,093                  |
| Shandong       | Maternal and Child Health Hospital of Dongchangfu District, Liaocheng City       | 1,204                  |
| Shandong       | Taian Maternal and Child Health Hospital                                         | 314                    |
| Shandong       | Jinan Maternal and Child Health Hospital                                         | 194                    |
| Gansu          | Gansu Provincial Maternity and Child-care Hospital                               | 1,596                  |
| Shaanxi        | Northwest Women and Children's Hospital                                          | 6,248                  |
| Henan          | Henan Provincial Maternal and Child Health Care Hospital                         | 5,431                  |
| Henan          | Anyang Maternal and Child Health Care Hospital                                   | 3,654                  |
| Henan          | Nanyang Center Hospital                                                          | 113                    |
| Jiangsu        | Subei People's Hospital of Yangzhou                                              | 630                    |
| Jiangsu        | Lianyungang Maternal and Child Health Hospital                                   | 369                    |
| Sichuan        | Chengdu Women and Children Central Hospital                                      | 1,987                  |
| Hunan          | Hunan Provincial Maternal and Child Health Care Hospital                         | 2,848                  |
| Hunan          | Changsha Hospital for Maternal&Child Health Care                                 | 278                    |
| Jiangxi        | Ganzhou Maternity and Child Health Hospital of Jiangxi Province                  | 1,912                  |
| Guizhou        | Maternal and Child Health Hospital of Guiyang                                    | 810                    |
| Yunnan         | Kunming City Maternal and Child Health Hospital                                  | 5,547                  |
| Guangdong      | Shenzhen Maternity&Child Healthcare Hospital                                     | 7,356                  |
| Hainan         | Hainan General Hospital                                                          | 4,049                  |

**Table S2. Previous studies of the associations of particulate matter exposure with blood pressure as well as hypertension prevalence, related to STAR Methods.**

| Authors, publication year            | Study design          | Country       | Population                                                              | Main findings                                                                                                                                                                                                                                                                                                                              |
|--------------------------------------|-----------------------|---------------|-------------------------------------------------------------------------|--------------------------------------------------------------------------------------------------------------------------------------------------------------------------------------------------------------------------------------------------------------------------------------------------------------------------------------------|
| Haralabidis et al. 2008 <sup>1</sup> | Cross-sectional study | Greece        | 140 subjects aged 45-70 years                                           | Effects of noise exposure on elevated subsequent BP measurements                                                                                                                                                                                                                                                                           |
| Ubiratan et al. 2005 <sup>2</sup>    | Cross-sectional study | Brazil        | 48 healthy, non-smoking vehicular traffic controllers, aged 31-55 years | Adult and healthy workers directly exposed to automotive traffic-generated air pollution, increases in primary gaseous pollutants were associated with changes in blood pressure                                                                                                                                                           |
| Guo et al. 2020 <sup>3</sup>         | Cohort study          | China         | 140,072 adults (≥18 years of age) without hypertension                  | A high-PA and low PM <sub>2.5</sub> exposure were associated with a lower risk of hypertension, and the positive association between PM <sub>2.5</sub> and hypertension was not modified by PA                                                                                                                                             |
| Peters et al. 2019 <sup>4</sup>      | Cross-sectional study | United States | 35,416 adults aged 20-75 years                                          | Sex differences in the control of hypertension, diabetes mellitus, and dyslipidemia persist                                                                                                                                                                                                                                                |
| Abe et al. 1994 <sup>5</sup>         | Cohort study          | Japan         | 14 male habitual drinkers with essential hypertension                   | A single intake of alcohol has a depressor effect on BP that lasts for several hours after drinking, while repeated intakes for 7 days have both depressor and pressor effects according to the differences in time intervals after the last drink                                                                                         |
| Bijmens et al. 2017 <sup>6</sup>     | Meta analysis         | Australia     | 6,330 adults aged 23-74 years                                           | A small significant reduction in systolic blood pressure (-1.05 mm Hg, 95% CI -2.08 to 0.02) and a smaller non-significant reduction in diastolic blood pressure                                                                                                                                                                           |
| Jill et al. 2014 <sup>7</sup>        | Cross-sectional study | Canada        | 280 women (mean age: 51.9 y)                                            | Black carbon (BC) from combustion emissions is more strongly associated with blood pressure than PM mass, and that BC's health effects may be larger among women living near a highway and with greater exposure to motor vehicle emissions                                                                                                |
| Dvonch et al. 2009 <sup>8</sup>      | Cross-sectional study | United States | 347 adults (mean age: 46.2 y ± 13.7)                                    | Young age (<55 years) and not taking BP medications to be significant predictors of increased BP effects, and short-term increases in exposure to ambient PM <sub>2.5</sub> are associated with acute increases in BP in adults, especially within communities with elevated levels of exposure                                            |
| Hoooven et al. 2011 <sup>9</sup>     | Cohort study          | Holland       | 7,006 pregnant women mean age 30.5 (19.3–39.4)                          | Elevated PM <sub>10</sub> exposure levels were associated with a steeper increase in systolic blood pressure throughout pregnancy (P<0.01), but not with diastolic blood pressure patterns. Elevated NO <sub>2</sub> exposure was associated with higher systolic blood pressure levels in the first, second, and third trimester (P<0.05) |
| Lin et al. 2017 <sup>10</sup>        | Cross-sectional study | China         | 12,665 adults (≥50 years of age)                                        | long-term exposure to ambient PM <sub>2.5</sub> might be an important risk factor of hypertension, and is responsible for significant hypertension burden in adults in China. A higher consumption of fruit may mitigate, while overweight and obesity could enhance this effect                                                           |
| Dong et al. 2013 <sup>11</sup>       | Cross-sectional study | China         | 28,830 adults 45.59 (±13.31) years                                      | Long-term exposure to PM <sub>10</sub> , SO <sub>2</sub> , and O <sub>3</sub> was associated with increased arterial blood pressure and hypertension                                                                                                                                                                                       |
| Diaz et al. 2014 <sup>12</sup>       | Cohort study          | United States | 2,043 adults (≥66.1 years of age)                                       | Healthy lifestyle factors, particularly physical activity and non-smoking, are associated with a lower risk for cardiovascular events and mortality among individuals with apparent treatment-resistant hypertension                                                                                                                       |
| Wu et al. 2020 <sup>13</sup>         | Cross-sectional study | China         | 9,354 children, aged 5 to 17 years                                      | Long-term exposure to PM <sub>1</sub> is associated with hypertension in children, and that PM <sub>1</sub> might be a leading contributor to the hypertensive effect of PM <sub>2.5</sub>                                                                                                                                                 |
| Diaz et al. 2017 <sup>14</sup>       | Cohort study          | United States | 1,311 adults (≥45.7 years of age)                                       | Regular moderate-vigorous physical activity or sport/exercise-related physical activity may reduce the risk of developing hypertension in African Americans                                                                                                                                                                                |

|                                       |                       |               |                                                                                     |                                                                                                                                                                                                                                                                                                    |
|---------------------------------------|-----------------------|---------------|-------------------------------------------------------------------------------------|----------------------------------------------------------------------------------------------------------------------------------------------------------------------------------------------------------------------------------------------------------------------------------------------------|
| Zhang et al. 2018 <sup>15</sup>       | Cross-sectional study | United States | 1,293 pregnant women mean age 28.5, and their children who between 3–9 years of age | Exposure to ambient PM <sub>2.5</sub> during the third trimester of pregnancy is associated with elevated BP in children, ages 3 to 9 years                                                                                                                                                        |
| Bo et al. 2019 <sup>16</sup>          | Cohort study          | China         | 134,978 adults (≥ 18 years of age)                                                  | PM <sub>2.5</sub> exposure is associated with a decreased incidence of hypertension                                                                                                                                                                                                                |
| Carrie et al. 2019 <sup>17</sup>      | Cohort study          | United States | 50,005 participants mean age was 25.5 (SD 4.5) years                                | Exposure to criteria air pollutants in the second trimester appeared to increase risk of gestational hypertension but not preeclampsia                                                                                                                                                             |
| Su et al. 2020 <sup>18</sup>          | Cohort study          | China         | 8,776 pregnant women mean age were 30.2 ± 3.6                                       | PM <sub>2.5</sub> exposure during the first trimester is associated with the development of HDP. The effect estimate is more obvious for nulliparous women than multiparous women                                                                                                                  |
| Zhang et al. 2021 <sup>19</sup>       | Cohort study          | China         | 7,658 pregnant women in this study had a mean (SD) age of 28.3 (3.5) years          | PM <sub>2.5</sub> exposure might play an important role in BP pattern during pregnancy and might increase the risk of HDP, especially among women with excessive gestational weight gain                                                                                                           |
| Zhang et al. 2019 <sup>20</sup>       | Cross-sectional study | China         | 43,745 children and adolescents aged 7-18 years                                     | Long-term exposure to ambient PM air pollution was associated with increased blood pressure and higher prevalence of hypertension in children and adolescents                                                                                                                                      |
| Li et al. 2022(Li et al., 2022)       | Cross-sectional study | China         | 37,610 of children and adolescents with age 7-18 years                              | Long-term exposure to PM <sub>2.5</sub> mass and specific PM <sub>2.5</sub> components, especially for black carbon, are significantly associated with elevated blood pressure and a higher hypertension prevalence in Chinese children and adolescents                                            |
| Madhloum et al. 2019 <sup>22</sup>    | Cross-sectional study | Belgium       | 427 term (gestational age > 36 weeks) births                                        | Prenatal air pollution exposure, greenness, and industrial area at maternal residence may affect offspring BP from birth onwards                                                                                                                                                                   |
| Li et al. 2022 <sup>23</sup>          | Cohort study          | China         | 55,232 aged 30-55 years                                                             | The protective effects of dietary nitrate intake and green leafy vegetables consumption against hypertension risk, and also identified a statistically significant interaction between dietary nitrate intake and long-term PM <sub>2.5</sub> exposure                                             |
| Pieters et al. 2015 <sup>24</sup>     | Cohort study          | Belgium       | 130 children aged 6-12 years                                                        | Children attending school on days with higher UFP concentrations (diameter < 100 nm) had higher systolic blood pressure. The association was dependent on UFP size, and there was no association with the PM <sub>2.5</sub> mass concentration                                                     |
| McCracken et al. 2007 <sup>25</sup>   | RCT                   | United States | 55 women adults (≥ 38 years of age)                                                 | The between-group comparisons provide evidence, particularly for DBP, that the chimney stove reduces blood pressure, and the before-and-after comparisons are consistent with this evidence                                                                                                        |
| Hoffmann et al. 2012 <sup>26</sup>    | Panel study           | United States | 70 subjects with T2DM aged 40-85 years                                              | In subjects with T2DM, PM was associated with increased BP, and ozone was associated with decreased BP                                                                                                                                                                                             |
| Zhang et al. 2018 <sup>27</sup>       | Cross-sectional study | China         | 361,560 adults ≥18 years                                                            | Long-term exposure to PM <sub>2.5</sub> air pollution is associated with higher blood pressure and an increased risk of hypertension                                                                                                                                                               |
| Chen et al. 2015 <sup>28</sup>        | Cross-sectional study | China         | 27,752 adults ≥65 years                                                             | One-year exposures to PM <sub>10</sub> , PM <sub>2.5-10</sub> , PM <sub>2.5</sub> absorbance, and NO <sub>x</sub> were associated with higher diastolic BP in elderly residents of Taipei                                                                                                          |
| Zhang et al. 2016(Zhang et al., 2016) | Cohort study          | China         | 74,880 participants with mean aged 61 years                                         | Long-term exposure to particulate matter was associated with small increases in risk of incident hypertension, particularly among younger women and the obese                                                                                                                                      |
| Chen et al. 2021 <sup>30</sup>        | Cross-sectional study | China         | 373 elderly mean age was 63.5 (5.8) years                                           | Short-term exposures to PM <sub>2.5</sub> and O <sub>3</sub> were associated with significant changes in BP, blood glucose and lipids, and psychosocial stress may increase the susceptibility of the participants to the adverse cardiovascular effects of PM <sub>2.5</sub> and O <sub>3</sub> . |

|                                       |                                               |               |                                                                                            |                                                                                                                                                                                                                                                                                            |
|---------------------------------------|-----------------------------------------------|---------------|--------------------------------------------------------------------------------------------|--------------------------------------------------------------------------------------------------------------------------------------------------------------------------------------------------------------------------------------------------------------------------------------------|
| Liao et al. 2021 <sup>31</sup>        | Single-arm, non-randomized intervention study | United States | 120 pregnant women, the mean age of pregnant women was 26.2 years (standard deviation 4.3) | The range of exposure contrasts falls on steep sections of estimated exposure-response curves for birthweight, blood pressure, and acute lower respiratory infections, implying potentially important health benefits when transitioning from solid fuels to liquefied petroleum gas (LPG) |
| Morita et al. 2019 <sup>32</sup>      | Cross-sectional study                         | Japan         | 5,109 participants (aged 52.5 ± 10.3 years)                                                | Frequency of forest walking is not associated with prevalence of hypertension                                                                                                                                                                                                              |
| Yang, B.Y., et al. 2019 <sup>33</sup> | Cross-sectional study                         | China         | 24,845 adults with a mean age of 45.6 years                                                | Beneficial associations between community greenness and blood pressure in Chinese adults, especially for women. Air pollution and body mass index only partly mediated the associations                                                                                                    |
| Xiao X et al. 2020 <sup>34</sup>      | Cross-sectional study                         | China         | 9,354 children from 62 schools with a mean age of 10.9 years                               | Greater greenness near schools had a beneficial effect on blood pressure, particularly in overweight or obese children                                                                                                                                                                     |
| Luo, Y N et al. 2022 <sup>35</sup>    | Cross-sectional study                         | China         | 61,229 Chinese citizens aged 6-18 years from 94 schools                                    | Higher greenness around schools may lower blood pressure levels and prevalent hypertension among Chinese children and adolescents, particularly in older subjects, boys, and those living in urban districts                                                                               |
| Warembourg et al. 2021 <sup>36</sup>  | Cohort study                                  | Spain         | 4,279 children aged 4-5 years                                                              | Low green space was associated with higher diastolic BP                                                                                                                                                                                                                                    |
| Yang et al. 2017 <sup>37</sup>        | Cross-sectional study                         | China         | 24,845 adults aged 18-74 years                                                             | Long-term exposure to ambient air pollution was more strongly associated with prehypertension than with hypertension, especially among females and the elderly                                                                                                                             |
| Yang et al. 2019 <sup>38</sup>        | Cross-sectional study                         | China         | 24,845 adults aged 18-74 years                                                             | Both PM <sub>1</sub> and PM <sub>2.5</sub> exposures were associated with elevated blood pressure levels and hypertension prevalence in Chinese adults. In addition, most of the pro-hypertensive effects of PM <sub>2.5</sub> may come from PM <sub>1</sub>                               |
| Wang et al. 2020 <sup>39</sup>        | Cross-sectional study                         | China         | 1.2 million pregnancy planners aged 18-45 years                                            | Long-term exposure to PM <sub>1</sub> as well as PM <sub>2.5</sub> was associated with increased SBP and DBP of Chinese young adults planning for pregnancy                                                                                                                                |
| Raphael et al. 2020 <sup>40</sup>     | Cross-sectional study                         | United States | 137,809 adults aged 35-70 years                                                            | Chronic exposures to outdoor PM <sub>2.5</sub> was associated with increased BP and hypertension while there were small inverse associations with household air pollution (HAP)                                                                                                            |
| Yang et al. 2018 <sup>41</sup>        | Meta analysis                                 | China         | 100 studies involving ≈ 0.7 million participants                                           | A positive association between ambient air pollution and increased BP and hypertension. Geographical and socio-demographic factors may modify the pro-hypertensive effects of air pollutants                                                                                               |
| Guan et al. 2020 <sup>42</sup>        | Clinical trial                                | China         | 479,842 adults                                                                             | The associations between ambient PM <sub>2.5</sub> exposure and elevated BP levels. The magnitude of the estimated associations varied substantially by geographic location in China                                                                                                       |
| Liu et al. 2017 <sup>43</sup>         | Cross-sectional study                         | China         | 13,975 participants aged 35-100 years                                                      | Long-term exposure to PM <sub>2.5</sub> was associated with increased prevalence of hypertension and slightly higher systolic BP in China. The effects of PM <sub>2.5</sub> on hypertension prevalence were stronger among middle-aged, obese and urban participants                       |
| Kateryna et al. 2017 <sup>44</sup>    | Cohort study                                  | Germany       | 41,072 participants with mean aged 47-71 years                                             | Long-term residential exposures to air pollution and noise are associated with increased incidence of self-reported hypertension                                                                                                                                                           |
| Sun et al. 2020 <sup>45</sup>         | Meta analysis                                 | China         | Ten articles                                                                               | There is a significant link between exposure to PM <sub>2.5</sub> and hypertensive disorders in pregnancy. The first and the third trimester were more susceptible to PM <sub>2.5</sub> exposure                                                                                           |
| Yan et al. 2021 <sup>46</sup>         | Meta analysis                                 | China         | Fifteen articles 0.5 million participants                                                  | Ambient air pollution was associated with higher hypertension prevalence and elevated blood pressure in children and adolescents                                                                                                                                                           |
| Li et al.                             | Cohort study                                  | China         | 39,259                                                                                     | Long-term exposure to ambient PM <sub>1</sub> increases the risk of                                                                                                                                                                                                                        |

|                                    |                       |               |                                                       |                                                                 |                                                                                                                                                                                                                                                     |
|------------------------------------|-----------------------|---------------|-------------------------------------------------------|-----------------------------------------------------------------|-----------------------------------------------------------------------------------------------------------------------------------------------------------------------------------------------------------------------------------------------------|
| 2019 <sup>47</sup>                 |                       |               |                                                       | participants<br>The mean age was 55.6 (SD:12.19) years          | hypertension and is associated with elevations in blood pressure in rural Chinese adults, especially in male and those with unhealthy habits                                                                                                        |
| Yuan et al. 2020 <sup>48</sup>     | Cohort study          | China         | 3692 mother-newborn pairs                             | maternal mean age was 28.9 (3.4) years,                         | Ambient PM <sub>2.5</sub> exposure exhibited adverse impacts on multiple outcomes including reduced birth weight, LBW and PTB in the late pregnancy                                                                                                 |
| Lee et al. 2012 <sup>49</sup>      | Cross-sectional study | United States | 2,211 pregnant                                        | with mean age was 24.9 (SD) = 5.9 years                         | First trimester PM <sub>10</sub> and O <sub>3</sub> air pollution exposures increase blood pressure in the later stages of pregnancy. These changes may play a role in mediating the relationships between air pollution and adverse birth outcomes |
| Song et al. 2020 <sup>50</sup>     | Cross-sectional study | United States | 6,814 White, Black, Hispanic and Chinese participants | aged 45–84 years                                                | Racial disparities in blood pressure were reduced after accounting for PM <sub>2.5</sub> and ozone while increased after accounting for NO <sub>x</sub>                                                                                             |
| Maria et al. 2020 <sup>51</sup>    | Cohort study          | United States | 537 mother-child maternal                             | mean age was 27.7 ± 5.59 years, children mean age was 4.80±0.56 | Second and third trimester PM <sub>2.5</sub> exposure may increase children's BP in early life                                                                                                                                                      |
| Mobasher et al. 2013 <sup>52</sup> | Case-control study    | United States | 298 pregnant women                                    | with mean aged 27.35 years                                      | Among non-obese women, first trimester exposure to PM <sub>2.5</sub> and carbon monoxide are associated with increased odds of Hypertensive Disorder of Pregnancy                                                                                   |
| Vanessa et al. 2019 <sup>53</sup>  | Cross-sectional study | United States | 16,637 pregnant                                       | with aged 30-34 years                                           | Maternal exposure to wood smoke in Monroe County during winter is associated with an increased odds of HDP during late gestation                                                                                                                    |
| Savitz et al. 2015 <sup>54</sup>   | Cross-sectional study | United States | 268,601                                               | participates                                                    | No correlation ambient air pollution on hypertensive disorders of pregnancy                                                                                                                                                                         |
| Xie et al. 2018 <sup>55</sup>      | Cross-sectional study | China         | 39,348,119                                            | participants reproductive-age (20-49 years)                     | Long-term exposures to PM <sub>2.5</sub> above certain levels might increase population risk for hypertension and might be responsible for China's avoidable hypertension burden in reproductive-age adults                                         |
| Hendriks et al. 2016 <sup>56</sup> | Cross-sectional study | Netherlands   | 1,500                                                 | eligible households                                             | Access to improved quality healthcare through an insurance program in rural Nigeria was associated with a significant longer-term reduction in systolic BP in subjects with moderate or severe hypertension                                         |

Abbreviations: BP, blood pressure; RCT, randomized control trial; PM<sub>2.5</sub>, particle with aerodynamic diameter ≤2.5 μm; PA, physical activity; CI, confidence interval; PM<sub>10</sub>, particle with aerodynamic diameter ≤10 μm; NO<sub>2</sub>, nitrogen dioxide; SO<sub>2</sub>, sulphur dioxide; O<sub>3</sub>, ozone; PM<sub>1</sub>, particle with aerodynamic diameter ≤1.0 μm; HDP, hypertensive disorders of pregnancy; DBP, diastolic blood pressure; SBP, systolic blood pressure; UFP, ultrafine particles; T2DM, type-2 diabetes mellitus; PM<sub>2.5-10</sub> is calculated by subtracting PM<sub>2.5</sub> from PM<sub>10</sub>; NO<sub>x</sub>, nitrogen oxides; LBW, low birth weight; PTB, premature birth.



**Table S3. Distributions and spearman correlations of PM<sub>1</sub> concentrations (µg/m<sup>3</sup>), related to Descriptive statistics of panel PM<sub>1</sub>.**

| Exposure           | Summary Statistics |        |      |       |       | Spearman           |                    |                    |
|--------------------|--------------------|--------|------|-------|-------|--------------------|--------------------|--------------------|
|                    | Mean (SD)          | Median | Min  | Max   | IQR   | FT PM <sub>1</sub> | ST PM <sub>1</sub> | TT PM <sub>1</sub> |
| FT PM <sub>1</sub> | 29.90 (9.35)       | 28.80  | 0.61 | 67.30 | 13.00 | 1.00               | 0.47               | 0.17               |
| ST PM <sub>1</sub> | 29.40 (8.97)       | 28.50  | 1.21 | 66.50 | 12.50 | 0.47               | 1.00               | 0.50               |
| TT PM <sub>1</sub> | 29.10 (9.40)       | 27.20  | 4.83 | 85.30 | 13.30 | 0.17               | 0.50               | 1.00               |

FT, first trimester; ST, second trimester; TT, third trimester; PM<sub>1</sub>, particle with aerodynamic diameter ≤1µm; SD, standard deviation; Min, Minimum; Max, Maximum; IQR, indicates interquartile range (calculated by subtracting the 25<sup>th</sup> percentile from the 75<sup>th</sup> percentile).

**Table S4. Association between each 10 µg/m<sup>3</sup> greater first-trimester PM<sub>1</sub> concentration and first-trimester blood pressure by potential effect modifiers\*, related to Figure 1.**

| Characteristics                      | Subgroups       | Systolic blood pressure |                          | Diastolic blood pressure |                          |
|--------------------------------------|-----------------|-------------------------|--------------------------|--------------------------|--------------------------|
|                                      |                 | aβ (95%CI)              | P <sub>interaction</sub> | aβ (95%CI)               | P <sub>interaction</sub> |
| Maternal age, years                  | ≤35             | 1.614 (1.446, 1.782)    | 0.001                    | 1.029 (0.875, 1.184)     | <0.001                   |
|                                      | >35             | 2.276 (1.809, 2.743)    |                          | 1.237 (0.787, 1.688)     |                          |
| Maternal ethnicity                   | Han             | 1.659 (1.496, 1.822)    | <0.001                   | 1.065 (0.914, 1.216)     | 0.435                    |
|                                      | Minority        | 2.573 (1.917, 3.230)    |                          | 0.927 (0.322, 1.532)     |                          |
| Maternal education, years            | ≤12             | 1.284 (1.066, 1.502)    | <0.001                   | 0.618 (0.416, 0.820)     | <0.001                   |
|                                      | 13-16           | 2.017 (1.766, 2.269)    |                          | 1.412 (1.179, 1.645)     |                          |
|                                      | ≥17             | 2.677 (2.144, 3.211)    |                          | 1.943 (1.437, 2.449)     |                          |
| Household annual income, CNY         | < 100,000       | 1.274 (1.016, 1.531)    | <0.001                   | 0.755 (0.519, 0.991)     | <0.001                   |
|                                      | 100,000-400,000 | 1.843 (1.625, 2.061)    |                          | 1.198 (0.995, 1.402)     |                          |
|                                      | > 400,000       | 2.680 (2.192, 3.167)    |                          | 1.745 (1.278, 2.212)     |                          |
| Pre pregnancy BMI, kg/m <sup>2</sup> | <25             | 1.803 (1.631, 1.976)    | 1.000                    | 1.135 (0.977, 1.294)     | 1.000                    |
|                                      | ≥25             | 1.324 (0.913, 1.735)    |                          | 0.696 (0.304, 1.089)     |                          |
| Conception season                    | Spring & Winter | 1.187 (1.003, 1.372)    | <0.001                   | 0.621 (0.445, 0.797)     | <0.001                   |
|                                      | Summer & Autumn | 4.100 (3.805, 4.395)    |                          | 2.648 (2.382, 2.914)     |                          |

PM<sub>1</sub>, particle with aerodynamic diameter ≤1.0 µm; BMI, body mass index; aβ indicates adjusted estimate; CI, confidence interval; CNY, China Yuan.

\*Adjusted model: adjusted for maternal age, pre-pregnancy body mass index, maternal ethnicity, maternal education, household annual income, conception season, and ambient temperature.

**Table S5. Association between each 10 µg/m<sup>3</sup> greater first-trimester PM<sub>1</sub> concentration and second-trimester blood pressure by potential effect modifiers\*, related to Figure 2.**

| Characteristics                      | Subgroups       | Systolic blood pressure |                          | Diastolic blood pressure |                          |
|--------------------------------------|-----------------|-------------------------|--------------------------|--------------------------|--------------------------|
|                                      |                 | aβ (95%CI)              | p <sub>interaction</sub> | aβ (95%CI)               | p <sub>interaction</sub> |
| Maternal age, years                  | ≤35             | 0.437 (0.293, 0.581)    | <0.001                   | 0.076 (-0.065, 0.217)    | <0.001                   |
|                                      | >35             | 0.626 (0.215, 1.036)    |                          | 0.283 (-0.135, 0.701)    |                          |
| Maternal ethnicity                   | Han             | 0.448 (0.308, 0.588)    | 0.613                    | 0.096 (-0.041, 0.234)    | 0.289                    |
|                                      | Minority        | 0.740 (0.142, 1.339)    |                          | 0.298 (-0.301, 0.898)    |                          |
| Maternal education, years            | ≤12             | 0.312 (0.125, 0.499)    | <0.001                   | -0.110 (-0.295, 0.075)   | <0.001                   |
|                                      | 13-16           | 0.576 (0.358, 0.795)    |                          | 0.287 (0.074, 0.501)     |                          |
|                                      | ≥17             | 0.757 (0.295, 1.220)    |                          | 0.583 (0.118, 1.047)     |                          |
| Household annual income, CNY         | < 100,000       | 0.494 (0.272, 0.716)    | <0.001                   | -0.016 (-0.234, 0.201)   | <0.001                   |
|                                      | 100,000-400,000 | 0.468 (0.280, 0.656)    |                          | 0.153 (-0.033, 0.338)    |                          |
|                                      | > 400,000       | 0.536 (0.106, 0.965)    |                          | 0.538 (0.110, 0.967)     |                          |
| Pre pregnancy BMI, kg/m <sup>2</sup> | <25             | 0.547 (0.400, 0.695)    | 1.000                    | 0.158 (0.013, 0.303)     | 1.000                    |
|                                      | ≥25             | 0.116 (-0.244, 0.476)   |                          | -0.097 (-0.451, 0.257)   |                          |
| Conception season                    | Spring & Winter | 0.244 (0.076, 0.412)    | 1.000                    | 0.125 (-0.042, 0.293)    | <0.001                   |
|                                      | Summer & Autumn | 0.601 (0.364, 0.838)    |                          | 0.240 (0.009, 0.470)     |                          |

PM<sub>1</sub>, particle with aerodynamic diameter ≤1.0 µm; BMI, body mass index; aβ indicates adjusted estimate; CI, confidence interval; CNY, China Yuan.

\*Adjusted model: adjusted for maternal age, pre-pregnancy body mass index, maternal ethnicity, maternal education, household annual income, conception season, and ambient temperature.

**Table S6. Association between each 10  $\mu\text{g}/\text{m}^3$  greater first-trimester  $\text{PM}_{10}$  concentration and third-trimester blood pressure by potential effect modifiers\*, related to Figure 4.**

| Characteristics                           | Subgroups       | Systolic blood pressure |                          | Diastolic blood pressure |                          |
|-------------------------------------------|-----------------|-------------------------|--------------------------|--------------------------|--------------------------|
|                                           |                 | $a\beta$ (95%CI)        | $p_{\text{interaction}}$ | $a\beta$ (95%CI)         | $p_{\text{interaction}}$ |
| Maternal age, years                       | $\leq 35$       | 0.067 (-0.077, 0.210)   | <0.001                   | -0.159 (-0.290, -0.027)  | <0.001                   |
|                                           | >35             | 0.384 (-0.020, 0.788)   |                          | 0.043 (-0.343, 0.429)    |                          |
| Maternal ethnicity                        | Han             | 0.076 (-0.064, 0.215)   | 0.981                    | -0.144 (-0.272, -0.016)  | 0.931                    |
|                                           | Minority        | 0.520 (-0.069, 1.108)   |                          | 0.008 (-0.544, 0.561)    |                          |
| Maternal education, years                 | $\leq 12$       | -0.094 (-0.279, 0.092)  | <0.001                   | -0.403 (-0.574, -0.232)  | <0.001                   |
|                                           | 13-16           | 0.296 (0.079, 0.514)    |                          | 0.126 (-0.074, 0.326)    |                          |
|                                           | $\geq 17$       | 0.292 (-0.168, 0.752)   |                          | 0.269 (-0.166, 0.703)    |                          |
| Household annual income, CNY              | < 100,000       | 0.027 (-0.192, 0.246)   | <0.001                   | -0.420 (-0.620, -0.219)  | <0.001                   |
|                                           | 100,000-400,000 | 0.142 (-0.045, 0.329)   |                          | 0.007 (-0.166, 0.180)    |                          |
|                                           | > 400,000       | 0.332 (-0.102, 0.766)   |                          | 0.311 (-0.094, 0.716)    |                          |
| Pre pregnancy BMI, $\text{kg}/\text{m}^2$ | <25             | 0.157 (0.010, 0.304)    | 1.000                    | -0.075 (-0.210, 0.060)   | 1.000                    |
|                                           | $\geq 25$       | -0.104 (-0.462, 0.254)  |                          | -0.382 (-0.712, -0.052)  |                          |
| Conception season                         | Spring&Winter   | -0.540 (-0.706, -0.374) | <0.001                   | -0.300 (-0.455, -0.146)  | <0.001                   |
|                                           | Summer&Autumn   | 0.097 (-0.141, 0.335)   |                          | -0.091 (-0.308, 0.126)   |                          |

$\text{PM}_{10}$ , particle with aerodynamic diameter  $\leq 1.0 \mu\text{m}$ ; BMI, body mass index;  $a\beta$  indicates adjusted estimate; CI, confidence interval; CNY, China Yuan.

\*Adjusted model: adjusted for maternal age, pre-pregnancy body mass index, maternal ethnicity, maternal education, household annual income, conception season, and ambient temperature.

**Table S7. Association between each 10  $\mu\text{g}/\text{m}^3$  greater first-trimester  $\text{PM}_{10}$  concentration and hypertensive disorders of pregnancy by potential effect modifiers\*, related to Figure 3.**

| Characteristics                           | Subgroups       | $\text{PM}_{10}$     |              |
|-------------------------------------------|-----------------|----------------------|--------------|
|                                           |                 | aOR (95% CI)         | Pinteraction |
| Maternal age, years                       | $\leq 35$       | 1.115 (1.071, 1.161) | 0.016        |
|                                           | $> 35$          | 1.103 (1.004, 1.211) |              |
| Maternal ethnicity                        | Han             | 1.116 (1.074, 1.159) | 0.784        |
|                                           | Minority        | 1.087 (0.930, 1.271) |              |
| Maternal education, years                 | $\leq 12$       | 1.018 (0.968, 1.070) | $< 0.001$    |
|                                           | 13-16           | 1.198 (1.125, 1.274) |              |
|                                           | $\geq 17$       | 1.361 (1.207, 1.534) |              |
| Household annual income, CNY              | $< 100,000$     | 1.009 (0.952, 1.070) | $< 0.001$    |
|                                           | 100,000-400,000 | 1.175 (1.114, 1.239) |              |
|                                           | $> 400,000$     | 1.289 (1.155, 1.439) |              |
| Pre pregnancy BMI, $\text{kg}/\text{m}^2$ | $< 25$          | 1.130 (1.084, 1.177) | 1.000        |
|                                           | $\geq 25$       | 1.066 (0.977, 1.163) |              |
| Conception season                         | Spring & Winter | 0.982 (0.933, 1.033) | 1.000        |
|                                           | Summer & Autumn | 1.287 (1.217, 1.362) |              |

$\text{PM}_{10}$ , particle with aerodynamic diameter  $\leq 1.0 \mu\text{m}$ ; BMI, body mass index; aOR, adjusted odds ratio; CI, confidence interval; CNY, China Yuan.

\*Adjusted model: adjusted for maternal age, pre-pregnancy body mass index, maternal ethnicity, maternal education, household annual income, conception season, and ambient temperature.

**Table S8. Association of each 10  $\mu\text{g}/\text{m}^3$  increase in first-trimester  $\text{PM}_{10}$  with maternal blood pressure and hypertensive disorders of pregnancy in different groups, related to Sensitivity analyses.**

| Sensitivity group    | Outcome              | $\text{PM}_{10}$       |           |
|----------------------|----------------------|------------------------|-----------|
|                      |                      | a $\beta$ /OR (95% CI) | p value   |
| Excluding Urban      | First trimester SBP  | 1.700 (1.357, 2.042)   | $< 0.001$ |
|                      | First trimester DBP  | 1.004 (0.680, 1.328)   | $< 0.001$ |
|                      | Second trimester SBP | 0.369 (0.059, 0.679)   | 0.020     |
|                      | Second trimester DBP | 0.149 (-0.159, 0.458)  | 0.343     |
|                      | Third trimester SBP  | -0.022 (-0.330, 0.286) | 0.890     |
|                      | Third trimester DBP  | -0.207 (-0.492, 0.078) | 0.155     |
|                      | HDP (aOR)            | 1.103 (1.021, 1.191)   | 0.013     |
| Excluding South      | First trimester SBP  | 1.783 (1.601, 1.965)   | $< 0.001$ |
|                      | First trimester DBP  | 1.106 (0.935, 1.276)   | $< 0.001$ |
|                      | Second trimester SBP | 0.635 (0.479, 0.792)   | $< 0.001$ |
|                      | Second trimester DBP | 0.193 (0.037, 0.349)   | 0.015     |
|                      | Third trimester SBP  | 0.447 (0.290, 0.604)   | $< 0.001$ |
|                      | Third trimester DBP  | 0.040 (-0.107, 0.187)  | 0.591     |
|                      | HDP (aOR)            | 1.219 (1.166, 1.274)   | $< 0.001$ |
| Excluding Decoration | First trimester SBP  | 1.685 (1.521, 1.849)   | $< 0.001$ |
|                      | First trimester DBP  | 1.049 (0.897, 1.200)   | $< 0.001$ |
|                      | Second trimester SBP | 0.462 (0.321, 0.603)   | $< 0.001$ |
|                      | Second trimester DBP | 0.094 (-0.045, 0.233)  | 0.183     |
|                      | Third trimester SBP  | 0.117 (-0.023, 0.257)  | 0.102     |

|                        |                      |                         |        |
|------------------------|----------------------|-------------------------|--------|
| Excluding ICAP         | Third trimester DBP  | -0.149 (-0.279, -0.02)  | 0.023  |
|                        | HDP (aOR)            | 1.108 (1.067, 1.152)    | <0.001 |
| Excluding ICCEITH      | First trimester SBP  | 1.685 (1.516, 1.853)    | <0.001 |
|                        | First trimester DBP  | 1.048 (0.892, 1.204)    | <0.001 |
|                        | Second trimester SBP | 0.442 (0.297, 0.587)    | <0.001 |
|                        | Second trimester DBP | 0.086 (-0.056, 0.229)   | 0.234  |
|                        | Third trimester SBP  | 0.131 (-0.013, 0.275)   | 0.074  |
|                        | Third trimester DBP  | -0.130 (-0.262, 0.002)  | 0.054  |
|                        | HDP (aOR)            | 1.118 (1.075, 1.163)    | <0.001 |
| Excluding keep animals | First trimester SBP  | 1.717 (1.556, 1.878)    | <0.001 |
|                        | First trimester DBP  | 1.083 (0.933, 1.232)    | <0.001 |
|                        | Second trimester SBP | 0.432 (0.293, 0.570)    | <0.001 |
|                        | Second trimester DBP | 0.083 (-0.054, 0.219)   | 0.234  |
|                        | Third trimester SBP  | 0.080 (-0.058, 0.218)   | 0.256  |
|                        | Third trimester DBP  | -0.143 (-0.27, -0.016)  | 0.028  |
|                        | HDP (aOR)            | 1.118 (1.076, 1.161)    | <0.001 |
| Excluding Multipara    | First trimester SBP  | 1.596 (1.429, 1.763)    | <0.001 |
|                        | First trimester DBP  | 0.985 (0.831, 1.140)    | <0.001 |
|                        | Second trimester SBP | 0.404 (0.260, 0.547)    | <0.001 |
|                        | Second trimester DBP | 0.017 (-0.124, 0.158)   | 0.814  |
|                        | Third trimester SBP  | 0.080 (-0.062, 0.223)   | 0.269  |
|                        | Third trimester DBP  | -0.174 (-0.306, -0.043) | 0.009  |
|                        | HDP (aOR)            | 1.094 (1.052, 1.138)    | <0.001 |
| Excluding Multipara    | First trimester SBP  | 1.790 (1.565, 2.016)    | <0.001 |
|                        | First trimester DBP  | 1.197 (0.988, 1.405)    | <0.001 |
|                        | Second trimester SBP | 0.479 (0.286, 0.672)    | <0.001 |
|                        | Second trimester DBP | 0.072 (-0.118, 0.262)   | 0.456  |
|                        | Third trimester SBP  | 0.145 (-0.047, 0.338)   | 0.139  |
|                        | Third trimester DBP  | -0.049 (-0.226, 0.128)  | 0.587  |
|                        | HDP (aOR)            | 1.140 (1.079, 1.204)    | <0.001 |

Abbreviations: PM<sub>1</sub>, particle with aerodynamic diameter ≤1.0 µm; SBP, systolic blood pressure; and DBP, diastolic blood pressure; HDP, hypertensive disorders of pregnancy; aβ indicates adjusted estimate; CI, confidence interval; aOR, adjusted odds ratio; ICAP, Indoor chemical air pollution; ICCEITH, indoor coal combustion emissions at home.

\*Adjusted model: adjusted for maternal age, maternal pre-pregnancy body mass index, maternal ethnicity, maternal education, household annual income, conception season, and ambient temperature.

**Table S9. Associations of each 10 µg/m<sup>3</sup> increase in first-trimester PM<sub>1</sub> concentrations during pregnancy with maternal blood pressure and hypertensive disorders of pregnancy\*, related to Sensitivity analyses.**

|    | SBP                   |         | DBP                     |         | HDP                  |         |
|----|-----------------------|---------|-------------------------|---------|----------------------|---------|
|    | aβ (95% CI)           | p value | aβ (95% CI)             | p value | aOR (95% CI)         | p value |
|    |                       |         |                         |         | 1.084 (1.043, 1.126) | <0.001  |
| FT | 1.341 (1.179, 1.502)  | <0.001  | 0.799 (0.649, 0.948)    | <0.001  |                      |         |
| ST | 0.347 (0.208, 0.486)  | <0.001  | 0.014 (-0.123, 0.151)   | 0.839   |                      |         |
| TT | 0.100 (-0.038, 0.239) | 0.156   | -0.201 (-0.329, -0.073) | 0.002   |                      |         |

FT, first-trimester; ST, second-trimester; TT, third-trimester; PM<sub>1</sub>, particle with aerodynamic diameter ≤1.0 µm; aβ indicates adjusted estimate; CI, confidence interval; aOR, adjusted odds ratio; SBP, systolic blood pressure; and DBP, diastolic blood pressure; HDP, hypertensive disorders of pregnancy.

\*Adjusted model: adjusted for maternal age, pre-pregnancy body mass index, maternal ethnicity, maternal education, household annual income, conception season, ambient temperature, ozone and PM<sub>1-2.5</sub> (calculated by subtracting PM<sub>1</sub> from PM<sub>2.5</sub>).

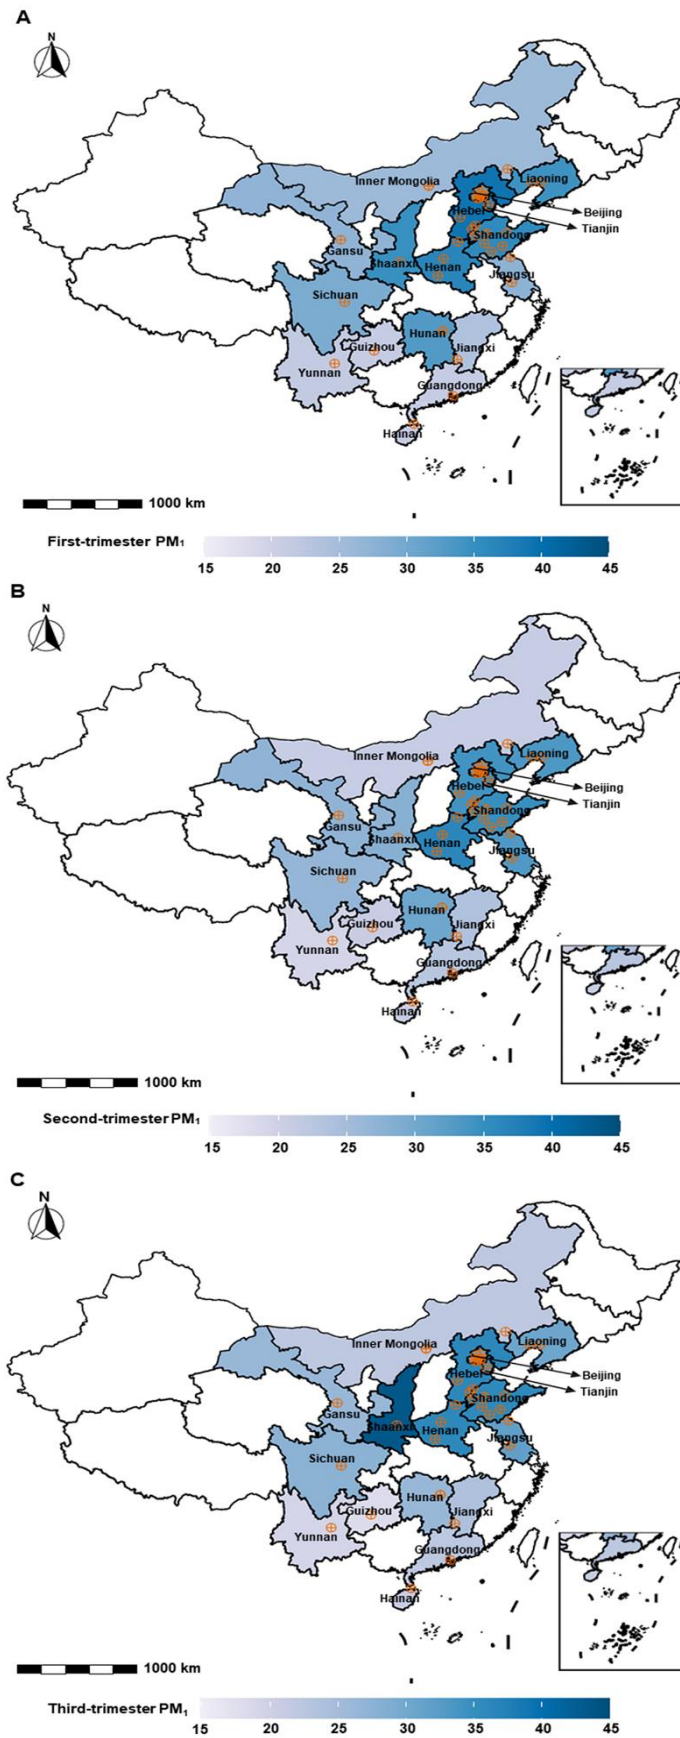

**Figure S1. Maps of study locations and PM<sub>1</sub> concentrations in the first (A), second (B), and third (C) trimesters, related to STAR Methods. ⊕ represent study locations.**

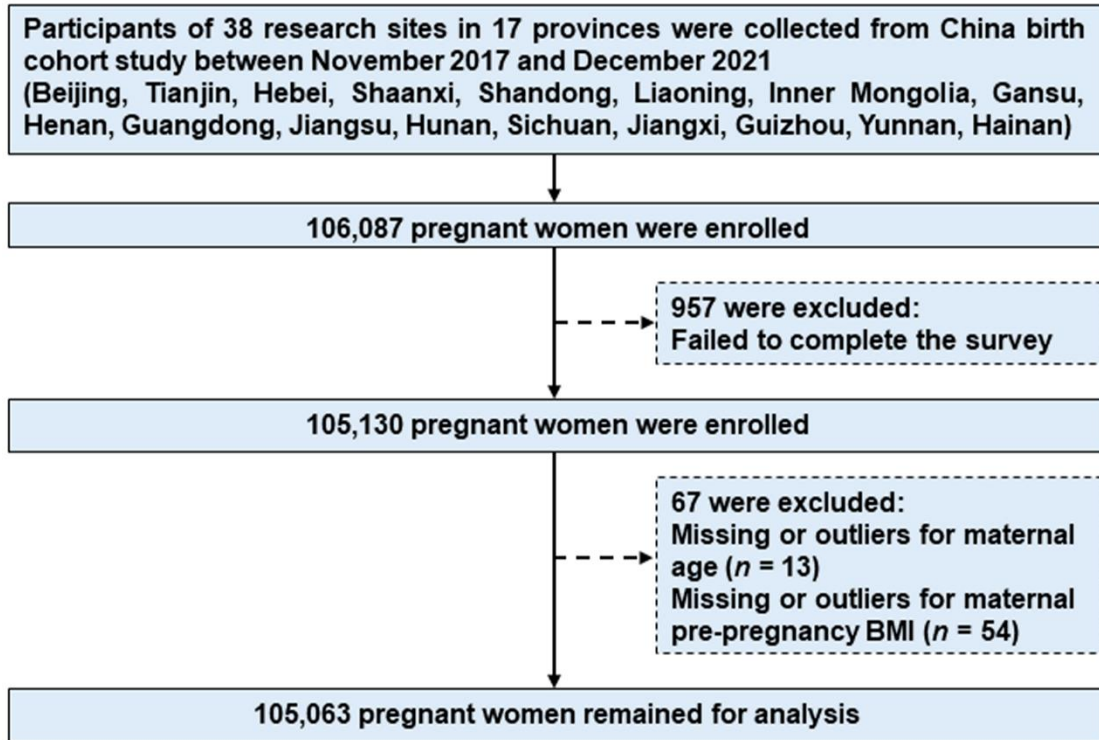

Figure S2. Participants for analysis, related to STAR Methods. BMI, body mass index.

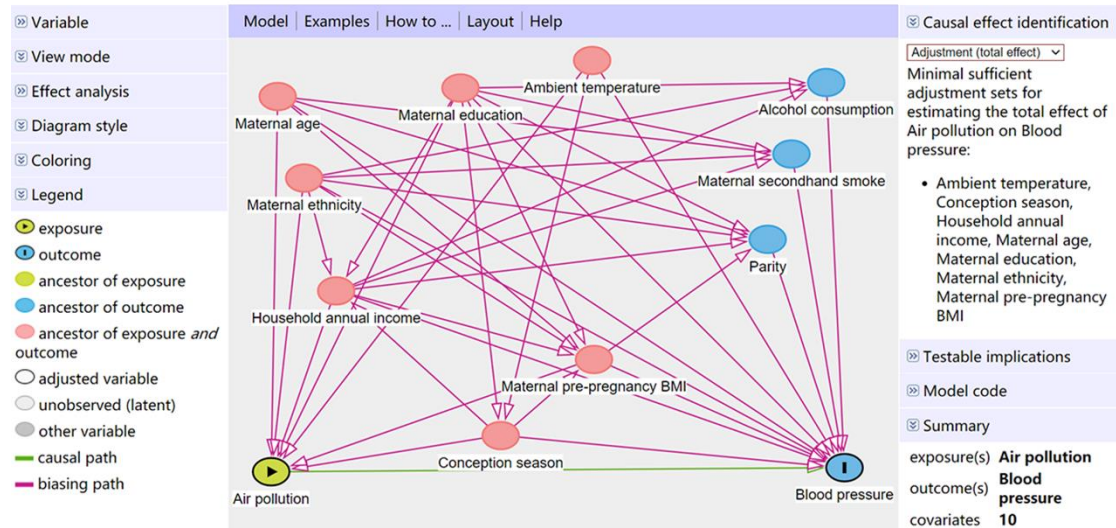

Figure S3. Directed acyclic graph for the association between ambient air pollution and blood pressure, created with the help of dagitty.net., related to STAR Methods. Pink markers indicate potential confounders. BMI, body mass index.

## References

1. Haralabidis, A. S., Dimakopoulou, K., Vigna-Taglianti, F., Giampaolo, M., Borgini, A., Dudley, M. L., Pershagen, G., Bluhm, G., Houthuijs, D., Babisch, W., et al. (2008). Acute effects of night-time noise exposure on blood pressure in populations living near airports. *Eur. Heart J.* 29, 658-664.
2. de Paula, S. U., Braga, A. L., Giorgi, D. M., Pereira, L. A., Grupi, C. J., Lin, C. A., Bussacos, M. A., Zanetta, D. M., Do, N. S. P., and Filho, M. T. (2005). Effects of air pollution on blood pressure and heart rate variability: a panel study of vehicular traffic controllers in the city of São Paulo, Brazil. *Eur. Heart J.* 26, 193-200.
3. Guo, C., Zeng, Y., Chang, L. Y., Yu, Z., Bo, Y., Lin, C., Lau, A. K., Tam, T., and Lao, X. Q. (2020). Independent and Opposing Associations of Habitual Exercise and Chronic PM<sub>2.5</sub> Exposures on Hypertension Incidence. *Circulation* 142, 645-656.
4. Peters, S., Muntner, P., and Woodward, M. (2019). Sex Differences in the Prevalence of, and Trends in, Cardiovascular Risk Factors, Treatment, and Control in the United States, 2001 to 2016. *Circulation* 139, 1025-1035.
5. Abe, H., Kawano, Y., Kojima, S., Ashida, T., Kuramochi, M., Matsuoka, H., and Omae, T. (1994). Biphasic effects of repeated alcohol intake on 24-hour blood pressure in hypertensive patients. *Circulation* 89, 2626-2633.
6. Bijlens, E. M., Nawrot, T. S., Loos, R. J., Gielen, M., Vlietinck, R., Derom, C., and Zeegers, M. P. (2017). Blood pressure in young adulthood and residential greenness in the early-life environment of twins. *Environ Health* 16, 53.
7. Baumgartner, J., Zhang, Y., Schauer, J. J., Huang, W., Wang, Y., and Ezzati, M. (2014). Highway proximity and black carbon from cookstoves as a risk factor for higher blood pressure in rural China. *Proc Natl Acad Sci U S A* 111, 13229-13234.
8. Dvonch, J. T., Kannan, S., Schulz, A. J., Keeler, G. J., Mentz, G., House, J., Benjamin, A., Max, P., Bard, R. L., and Brook, R. D. (2009). Acute effects of ambient particulate matter on blood pressure: differential effects across urban communities. *Hypertension* 53, 853-859.
9. van den Hooven, E. H., de Kluizenaar, Y., Pierik, F. H., Hofman, A., van Ratingen, S. W., Zandveld, P. Y., Mackenbach, J. P., Steegers, E. A., Miedema, H. M., and Jaddoe, V. W. (2011). Air pollution, blood pressure, and the risk of hypertensive complications during pregnancy: the generation R study. *Hypertension* 57, 406-412.
10. Lin, H., Guo, Y., Zheng, Y., Di Q, Liu, T., Xiao, J., Li, X., Zeng, W., Cummings-Vaughn, L. A., Howard, S. W., et al. (2017). Long-Term Effects of Ambient PM<sub>2.5</sub> on Hypertension and Blood Pressure and Attributable Risk Among Older Chinese Adults. *Hypertension* 69, 806-812.
11. Dong, G. H., Qian, Z. M., Xaverius, P. K., Trevathan, E., Maalouf, S., Parker, J., Yang, L., Liu, M. M., Wang, D., Ren, W. H., et al. (2013). Association between long-term air pollution and increased blood pressure and hypertension in China. *Hypertension* 61, 578-584.
12. Diaz, K. M., Booth, J. R., Calhoun, D. A., Irvin, M. R., Howard, G., Safford, M. M., Muntner, P., and Shimbo, D. (2014). Healthy lifestyle factors and risk of cardiovascular events and mortality in treatment-resistant hypertension: the Reasons for Geographic and Racial Differences in Stroke study. *Hypertension* 64, 465-471.
13. Wu, Q. Z., Li, S., Yang, B. Y., Bloom, M., Shi, Z., Knibbs, L., Dharmage, S., Leskinen, A., Jalaludin, B., Jalava, P., et al. (2020). Ambient Airborne Particulates of Diameter  $\leq 1 \mu\text{m}$ , a Leading Contributor to the Association Between Ambient Airborne Particulates of Diameter  $\leq 2.5 \mu\text{m}$  and Children's Blood Pressure. *Hypertension* 75, 347-355.
14. Diaz, K. M., Booth, J. R., Seals, S. R., Abdalla, M., Dubbert, P. M., Sims, M., Ladapo, J. A., Redmond, N., Muntner, P., and Shimbo, D. (2017). Physical Activity and Incident Hypertension in African Americans: The Jackson Heart Study. *Hypertension* 69, 421-427.
15. Zhang, M., Mueller, N. T., Wang, H., Hong, X., Appel, L. J., and Wang, X. (2018). Maternal Exposure to Ambient Particulate Matter  $\leq 2.5 \mu\text{m}$  During Pregnancy and the Risk for High Blood Pressure in Childhood. *Hypertension* 72, 194-201.
16. Bo, Y., Guo, C., Lin, C., Chang, L. Y., Chan, T. C., Huang, B., Lee, K. P., Tam, T., Lau, A., Lao, X. Q., et al. (2019). Dynamic Changes in Long-Term Exposure to Ambient Particulate Matter and Incidence of Hypertension in Adults. *Hypertension* 74, 669-677.
17. Nobles, C. J., Williams, A., Ouidir, M., Sherman, S., and Mendola, P. (2019). Differential Effect of Ambient Air Pollution Exposure on Risk of Gestational Hypertension and Preeclampsia. *Hypertension* 74, 384-390.
18. Su, X., Zhao, Y., Yang, Y., and Hua, J. (2020). Correlation between exposure to fine



- particulate matter and hypertensive disorders of pregnancy in Shanghai, China. *Environ Health* 19, 101.
19. Zhang, Y., Li, J., Liao, J., Hu, C., Cao, Z., Xia, W., Xu, S., and Li, Y. (2021). Impacts of Ambient Fine Particulate Matter on Blood Pressure Pattern and Hypertensive Disorders of Pregnancy: Evidence from the Wuhan Cohort Study. *Hypertension* 77, 1133-1140.
  20. Zhang, Z., Dong, B., Li, S., Chen, G., Yang, Z., Dong, Y., Wang, Z., Ma, J., and Guo, Y. (2019). Exposure to ambient particulate matter air pollution, blood pressure and hypertension in children and adolescents: A national cross-sectional study in China. *Environ. Int.* 128, 103-108.
  21. Li, J., Dong, Y., Song, Y., Dong, B., van Donkelaar, A., Martin, R. V., Shi, L., Ma, Y., Zou, Z., and Ma, J. (2022). Long-term effects of PM(2.5) components on blood pressure and hypertension in Chinese children and adolescents. *Environ. Int.* 161, 107134.
  22. Madhloum, N., Nawrot, T. S., Gyselaers, W., Roels, H. A., Bijlens, E., Vanpoucke, C., Lefebvre, W., Janssen, B. G., and Cox, B. (2019). Neonatal blood pressure in association with prenatal air pollution exposure, traffic, and land use indicators: An ENVIRONAGE birth cohort study. *Environ. Int.* 130, 104853.
  23. Li, X., Zhang, W., Laden, F., Curhan, G. C., Rimm, E. B., Guo, X., Hart, J. E., and Wu, S. (2022). Dietary nitrate intake and vegetable consumption, ambient particulate matter, and risk of hypertension in the Nurses' Health study. *Environ. Int.* 161, 107100.
  24. Pieters, N., Koppen, G., Van Poppel, M., De Prins, S., Cox, B., Dons, E., Nelen, V., Panis, L. I., Plusquin, M., Schoeters, G., et al. (2015). Blood Pressure and Same-Day Exposure to Air Pollution at School: Associations with Nano-Sized to Coarse PM in Children. *Environ Health Perspect* 123, 737-742.
  25. McCracken, J. P., Smith, K. R., Díaz, A., Mittleman, M. A., and Schwartz, J. (2007). Chimney stove intervention to reduce long-term wood smoke exposure lowers blood pressure among Guatemalan women. *Environ Health Perspect* 115, 996-1001.
  26. Hoffmann, B., Luttmann-Gibson, H., Cohen, A., Zanobetti, A., de Souza, C., Foley, C., Suh, H. H., Coull, B. A., Schwartz, J., Mittleman, M., et al. (2012). Opposing effects of particle pollution, ozone, and ambient temperature on arterial blood pressure. *Environ Health Perspect* 120, 241-246.
  27. Zhang, Z., Guo, C., Lau, A., Chan, T. C., Chuang, Y. C., Lin, C., Jiang, W. K., Yeoh, E. K., Tam, T., Woo, K. S., et al. (2018). Long-Term Exposure to Fine Particulate Matter, Blood Pressure, and Incident Hypertension in Taiwanese Adults. *Environ Health Perspect* 126, 17008.
  28. Chen, S. Y., Wu, C. F., Lee, J. H., Hoffmann, B., Peters, A., Brunekreef, B., Chu, D. C., and Chan, C. C. (2015). Associations between Long-Term Air Pollutant Exposures and Blood Pressure in Elderly Residents of Taipei City: A Cross-Sectional Study. *Environ Health Perspect* 123, 779-784.
  29. Zhang, Z., Laden, F., Forman, J. P., and Hart, J. E. (2016). Long-Term Exposure to Particulate Matter and Self-Reported Hypertension: A Prospective Analysis in the Nurses' Health Study. *Environ Health Perspect* 124, 1414-1420.
  30. Chen, Q., Li, H., Liu, Q., Wang, W., Deng, F., Sun, Z., Guo, X., and Wu, S. (2021). Does psychosocial stress modify the association of fine particulate matter and ozone with cardiovascular health indicators? *Environ. Pollut.* 277, 116726.
  31. Liao, J., Kirby, M. A., Pillarisetti, A., Piedrahita, R., Balakrishnan, K., Sambandam, S., Mukhopadhyay, K., Ye, W., Rosa, G., Majorin, F., et al. (2021). LPG stove and fuel intervention among pregnant women reduce fine particle air pollution exposures in three countries: Pilot results from the HAPIN trial. *Environ. Pollut.* 291, 118198.
  32. Morita, E., Kadomatsu, Y., Tsukamoto, M., Kubo, Y., Okada, R., Sasakabe, T., Kawai, S., Hishida, A., Naito, M., and Wakai, K. (2019). Frequency of forest walking is not associated with prevalence of hypertension based on cross-sectional studies of a general Japanese population: a reconfirmation by the J-MICC Daiko Study. *Nagoya J. Med. Sci.* 81, 489-500.
  33. Yang, B. Y., Markevych, I., Bloom, M. S., Heinrich, J., Guo, Y., Morawska, L., Dharmage, S. C., Knibbs, L. D., Jalaludin, B., Jalava, P., et al. (2019). Community greenness, blood pressure, and hypertension in urban dwellers: The 33 Communities Chinese Health Study. *Environ. Int.* 126, 727-734.
  34. Xiao, X., Yang, B. Y., Hu, L. W., Markevych, I., Bloom, M. S., Dharmage, S. C., Jalaludin, B., Knibbs, L. D., Heinrich, J., Morawska, L., et al. (2020). Greenness around schools associated with lower risk of hypertension among children: Findings from the Seven Northeastern Cities Study in China. *Environ. Pollut.* 256, 113422.

35. Luo, Y. N., Yang, B. Y., Zou, Z., Markevych, I., Browning, M., Heinrich, J., Bao, W. W., Guo, Y., Hu, L. W., Chen, G., et al. (2022). Associations of greenness surrounding schools with blood pressure and hypertension: A nationwide cross-sectional study of 61,229 children and adolescents in China. *Environ. Res.* *204*, 112004.
36. Warembourg, C., Nieuwenhuijsen, M., Ballester, F., de Castro, M., Chatzi, L., Esplugues, A., Heude, B., Maitre, L., McEachan, R., Robinson, O., et al. (2021). Urban environment during early-life and blood pressure in young children. *Environ. Int.* *146*, 106174.
37. Yang, B. Y., Qian, Z. M., Vaughn, M. G., Nelson, E. J., Dharmage, S. C., Heinrich, J., Lin, S., Lawrence, W. R., Ma, H., Chen, D. H., et al. (2017). Is prehypertension more strongly associated with long-term ambient air pollution exposure than hypertension? Findings from the 33 Communities Chinese Health Study. *Environ. Pollut.* *229*, 696-704.
38. Yang, B. Y., Guo, Y., Bloom, M. S., Xiao, X., Qian, Z. M., Liu, E., Howard, S. W., Zhao, T., Wang, S. Q., Li, S., et al. (2019). Ambient PM(1) air pollution, blood pressure, and hypertension: Insights from the 33 Communities Chinese Health Study. *Environ. Res.* *170*, 252-259.
39. Wang, Y. Y., Li, Q., Guo, Y., Zhou, H., Wang, Q. M., Shen, H. P., Zhang, Y. P., Yan, D. H., Li, S., Chen, G., et al. (2020). Long-term exposure to airborne particulate matter of 1  $\mu\text{m}$  or less and blood pressure in healthy young adults: A national study with 1.2 million pregnancy planners. *Environ. Res.* *184*, 109113.
40. Arku, R. E., Brauer, M., Ahmed, S. H., AlHabib, K. F., Avezum, Á., Bo, J., Choudhury, T., Dans, A. M., Gupta, R., Iqbal, R., et al. (2020). Long-term exposure to outdoor and household air pollution and blood pressure in the Prospective Urban and Rural Epidemiological (PURE) study. *Environ. Pollut.* *262*, 114197.
41. Yang, B. Y., Qian, Z., Howard, S. W., Vaughn, M. G., Fan, S. J., Liu, K. K., and Dong, G. H. (2018). Global association between ambient air pollution and blood pressure: A systematic review and meta-analysis. *Environ. Pollut.* *235*, 576-588.
42. Guan, T., Xue, T., Wang, X., Zheng, Y., Guo, J., Kang, Y., Chen, Z., Zhang, L., Zheng, C., Jiang, L., et al. (2020). Geographic variations in the blood pressure responses to short-term fine particulate matter exposure in China. *Sci. Total Environ.* *722*, 137842.
43. Liu, C., Chen, R., Zhao, Y., Ma, Z., Bi, J., Liu, Y., Meng, X., Wang, Y., Chen, X., Li, W., et al. (2017). Associations between ambient fine particulate air pollution and hypertension: A nationwide cross-sectional study in China. *Sci. Total Environ.* *584-585*, 869-874.
44. Fuks, K. B., Weinmayr, G., Basagana, X., Gruzieva, O., Hampel, R., Oftedal, B., Sorensen, M., Wolf, K., Aamodt, G., Aasvang, G. M., et al. (2017). Long-term exposure to ambient air pollution and traffic noise and incident hypertension in seven cohorts of the European study of cohorts for air pollution effects (ESCAPE). *Eur. Heart J.* *38*, 983-990.
45. Sun, M., Yan, W., Fang, K., Chen, D., Liu, J., Chen, Y., Duan, J., Chen, R., Sun, Z., Wang, X., et al. (2020). The correlation between PM (2.5) exposure and hypertensive disorders in pregnancy: A Meta-analysis. *Sci. Total Environ.* *703*, 134985.
46. Yan, M., Xu, J., Li, C., Guo, P., Yang, X., and Tang, N. J. (2021). Associations between ambient air pollutants and blood pressure among children and adolescents: A systemic review and meta-analysis. *Sci. Total Environ.* *785*, 147279.
47. Li, N., Chen, G., Liu, F., Mao, S., Liu, Y., Hou, Y., Lu, Y., Liu, S., Wang, C., Xiang, H., et al. (2019). Associations of long-term exposure to ambient PM1 with hypertension and blood pressure in rural Chinese population: The Henan rural cohort study. *Environ. Int.* *128*, 95-102.
48. Xiao, X., Yao, T., Du S, Zhang, J., Huang, T., Lei, Y., Cao, L., Shen, Z., and Cao, Y. (2020). Age differences in the pulmonary and vascular pathophysiologic processes after long-term real-time exposure to particulate matter in rats. *Chemosphere* *261*, 127710.
49. Lee, P. C., Talbott, E. O., Roberts, J. M., Catov, J. M., Bilonick, R. A., Stone, R. A., Sharma, R. K., and Ritz, B. (2012). Ambient air pollution exposure and blood pressure changes during pregnancy. *Environ. Res.* *117*, 46-53.
50. Song, L., Smith, G. S., Adar, S. D., Post, W. S., Guallar, E., Navas-Acien, A., Kaufman, J. D., and Jones, M. R. (2020). Ambient air pollution as a mediator in the pathway linking race/ethnicity to blood pressure elevation: The multi-ethnic study of atherosclerosis (MESA). *Environ. Res.* *180*, 108776.
51. Rosa, M. J., Hair, G. M., Just, A. C., Kloog, I., Svensson, K., Pizano-Zárate, M. L., Pantic, I., Schnaas, L., Tamayo-Ortiz, M., Baccarelli, A. A., et al. (2020). Identifying critical windows of prenatal particulate matter (PM (2.5)) exposure and early childhood blood pressure. *Environ. Res.* *182*, 109073.

52. Mobasher, Z., Salam, M. T., Goodwin, T. M., Lurmann, F., Ingles, S. A., and Wilson, M. L. (2013). Associations between ambient air pollution and Hypertensive Disorders of Pregnancy. *Environ. Res.* 123, 9-16.
53. Assibey-Mensah, V., Glantz, J. C., Hopke, P. K., Jusko, T. A., Thevenet-Morrison, K., Chalupa, D., and Rich, D. Q. (2019). Ambient wintertime particulate air pollution and hypertensive disorders of pregnancy in Monroe County, New York. *Environ. Res.* 168, 25-31.
54. Savitz, D. A., Elston, B., Bobb, J. F., Clougherty, J. E., Dominici, F., Ito, K., Johnson, S., McAlexander, T., Ross, Z., Shmool, J. L., et al. (2015). Ambient Fine Particulate Matter, Nitrogen Dioxide, and Hypertensive Disorders of Pregnancy in New York City. *Epidemiology* 26, 748-757.
55. Xie, X., Wang, Y., Yang, Y., Xu, J., Zhang, Y., Tang, W., Guo, T., Wang, Q., Shen, H., Zhang, Y., et al. (2018). Long-Term Effects of Ambient Particulate Matter (With an Aerodynamic Diameter  $\leq 2.5 \mu\text{m}$ ) on Hypertension and Blood Pressure and Attributable Risk Among Reproductive-Age Adults in China. *J. Am. Heart Assoc.* 7, e8553.
56. Hendriks, M. E., Rosendaal, N. T., Wit, F. W., Bolarinwa, O. A., Kramer, B., Brals, D., Gustafsson-Wright, E., Adenusi, P., Brewster, L. M., Osagbemi, G. K., et al. (2016). Sustained effect of health insurance and facility quality improvement on blood pressure in adults with hypertension in Nigeria: A population-based study. *Int. J. Cardiol.* 202, 477-484.
